# Supplementary material for: Study of synergistic effect between CuO and CeO2 over CuO@CeO2 core–shell nanocomposites for NH3-SCO
Source: Royal Society of Chemistry journal article supplement (doi:10.1039/c9cy00480g), 2019-01-01
Supplement: c9cy00480g1.pdf [file c9cy00480g1.pdf]

Electronic Supplementary Information for Catalysis Science & Technology

**Study of Synergistic Effect between CuO and CeO<sub>2</sub> over CuO@CeO<sub>2</sub>  
Core-Shell Nanocomposites for NH<sub>3</sub>-SCO**

Xiaoyu Zhang, Hui Wang, Xiao Jiang, Hongchun Sun, Zhenping Qu\*

*Key Laboratory of Industrial Ecology and Environmental Engineering, School of Environmental  
Science and Technology, Dalian University of Technology, Dalian, 116024, China*

**Summary**

This supporting information contains a total of 5 pages, including 4 figures.

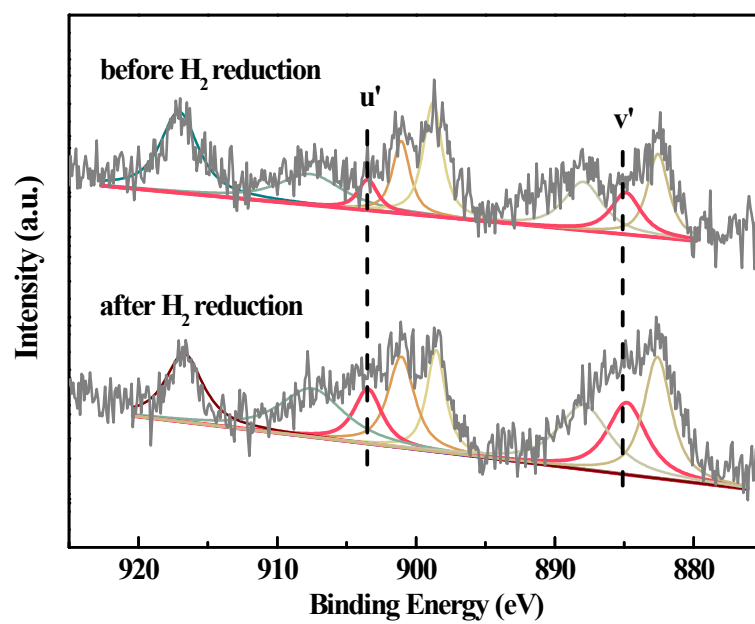

**Figure S1** Ce 3d XPS spectra of CuO@CeO<sub>2</sub>-8 catalyst before and after H<sub>2</sub> reduction (10%H<sub>2</sub>-Ar, 400°C, 1h).

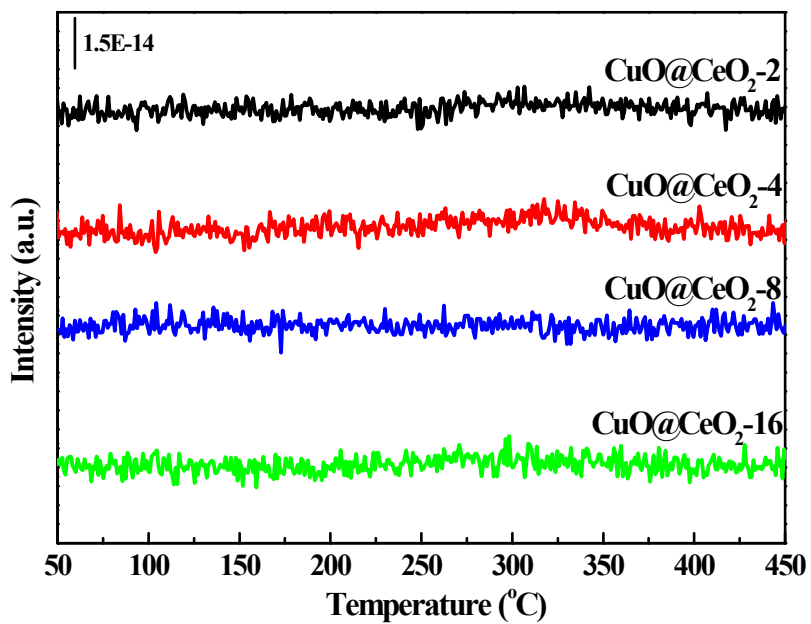

Figure S2 Production of NO<sub>2</sub> (m/e=46) over CuO@CeO<sub>2</sub>-X.

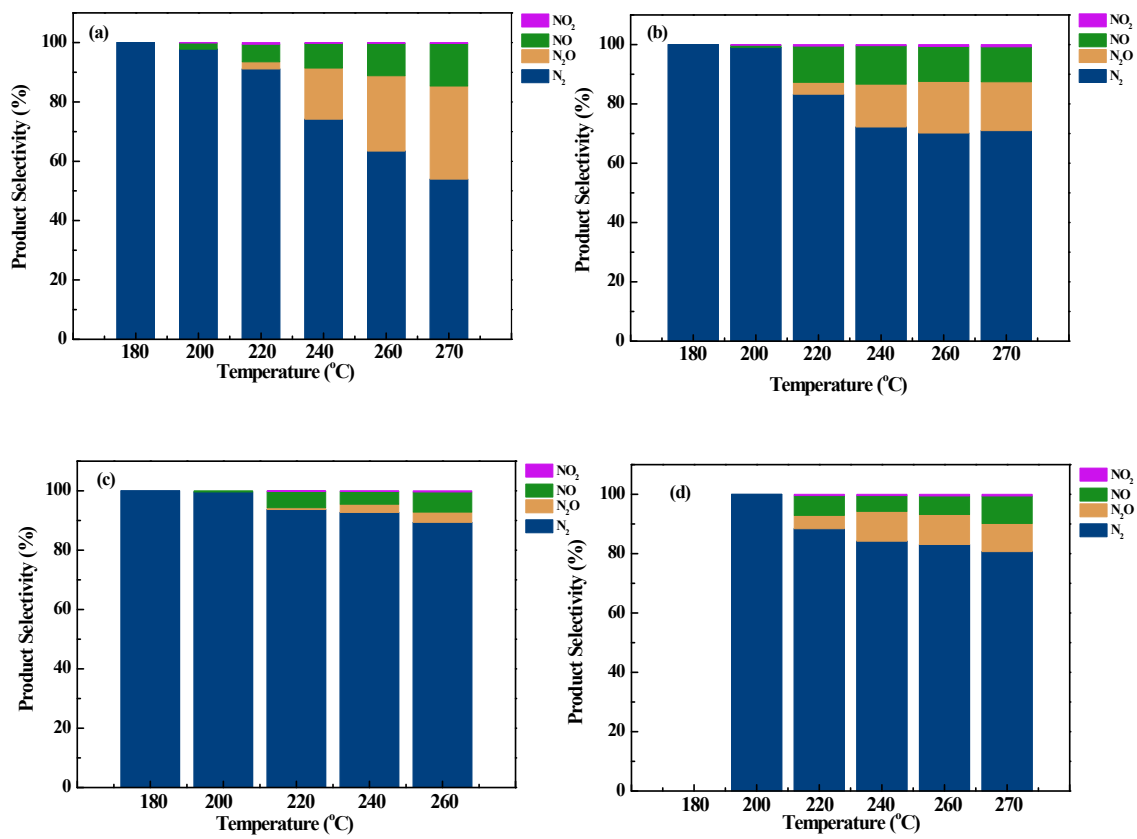

**Figure S3** Selectivity of  $N_2$  and  $NO_x$  over  $CuO@CeO_2-X$  at each temperature point. (a)

$CuO@CeO_2-2$ , (b)  $CuO@CeO_2-4$ , (c)  $CuO@CeO_2-8$ , (d)  $CuO@CeO_2-16$ .

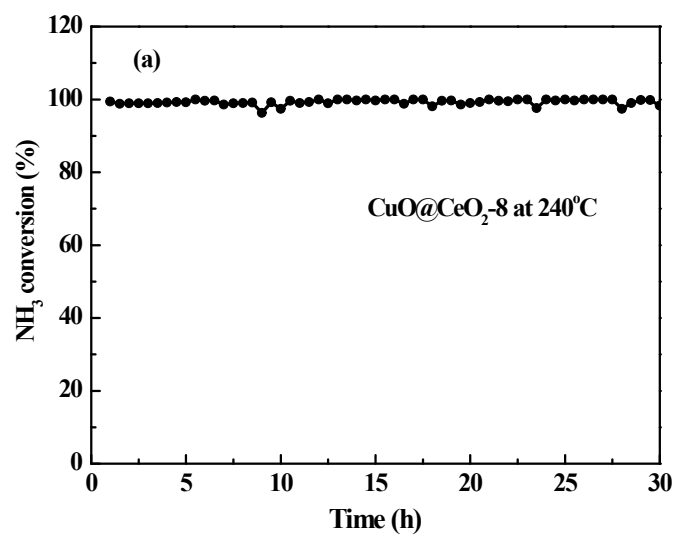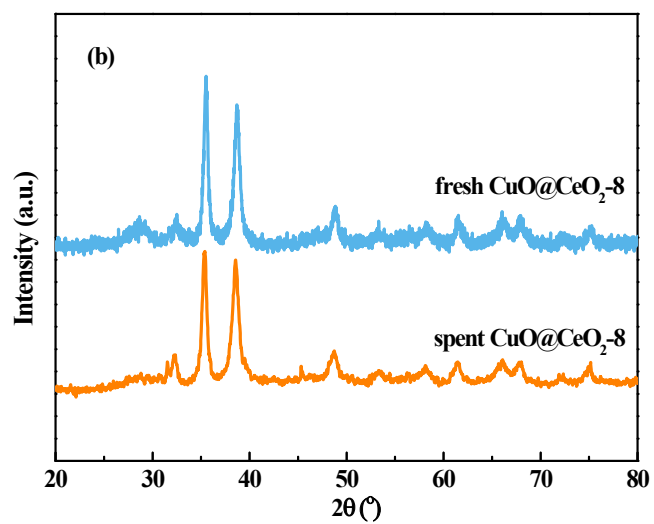

**Figure S4** Stability test of CuO@CeO<sub>2</sub>-8 (a) and crystalline comparison of fresh and spent CuO@CeO<sub>2</sub>-8 (b).
